# Supplementary material for: Systemic immune-inflammation index, thymidine phosphorylase and survival of localized gastric cancer patients after curative resection
Source: PubMed Central journal article supplement (PMC5190088; doi:10.18632/oncotarget.9923), 2016-06-08
Supplement: oncotarget-07-44185-s001.pdf [file oncotarget-07-44185-s001.pdf]

## Systemic immune-inflammation index, thymidine phosphorylase and survival of localized gastric cancer patients after curative resection

### SUPPLEMENTARY FIGURE AND TABLES

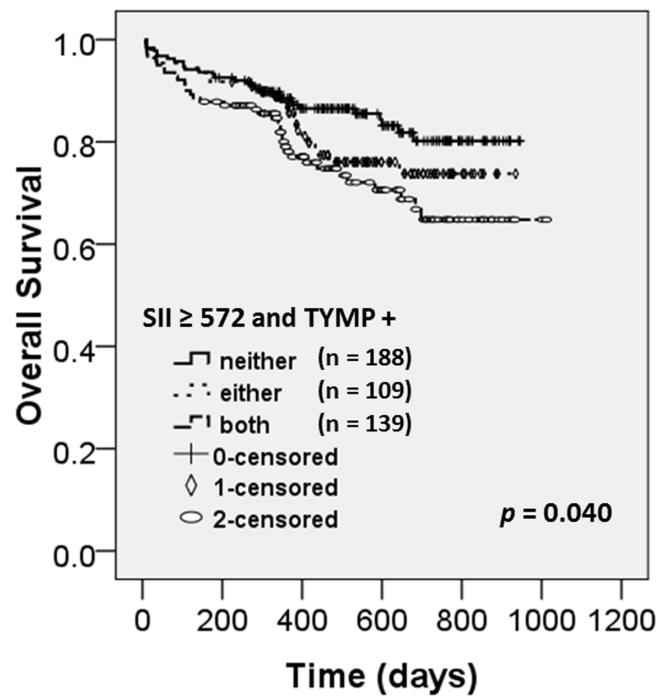

**Supplementary Figure S1: The prognostic significance of SII and thymidine phosphorylase (TYMP) expression in gastric cancer (GC) patients.** 0 = SII < 572 / TYMP negative; 1 = SII  $\geq$  572 / TYMP negative or SII < 572 / TYMP positive, ; 2 = SII  $\geq$  572 / TYMP positive.

**Supplementary Table S1: Receiver operating characteristics (ROC) analysis for the cut-off value of SII**

See Supplementary File 1

Supplementary Table S2: The univariate Cox analyses of OS (n = 455)

|                        | HR    | 95% CI |       | p-value |
|------------------------|-------|--------|-------|---------|
| Age(y)                 | 0.772 | 0.503  | 1.184 | 0.236   |
| sex                    | 1.112 | 0.727  | 1.700 | 0.625   |
| Tumor differentiation  | 1.459 | 1.188  | 1.793 | < 0.001 |
| Lauren classification  | 1.002 | 0.773  | 1.298 | 0.990   |
| Tumor site             | 0.967 | 0.730  | 1.283 | 0.818   |
| Pathological TNM stage | 3.134 | 2.157  | 4.555 | < 0.001 |
| T stage                | 1.887 | 1.475  | 2.413 | < 0.001 |
| N stage                | 1.854 | 1.549  | 2.218 | < 0.001 |
| NLR*                   | 0.996 | 0.956  | 1.038 | 0.862   |
| PLR*                   | 0.999 | 0.998  | 1.000 | 0.268   |
| SII*                   | 1.001 | 1.000  | 1.001 | < 0.001 |

\*, n = 445; NLR, neutrophil-lymphocyte ratio; PLR, platelet-lymphocyte ratio; SII, systemic immune-inflammation index; CI, confidence interval.
